# Supplementary material for: Lifelong absence of microglia alters hippocampal glutamatergic networks but not synapse and spine density
Source: PubMed Central journal article supplement (PMC11094096; doi:10.1038/s44319-024-00130-9), 2024-04-08
Supplement: 44319_2024_130_MOESM10_ESM.pdf [file 44319_2024_130_MOESM10_ESM.pdf]

## Expanded View Figures

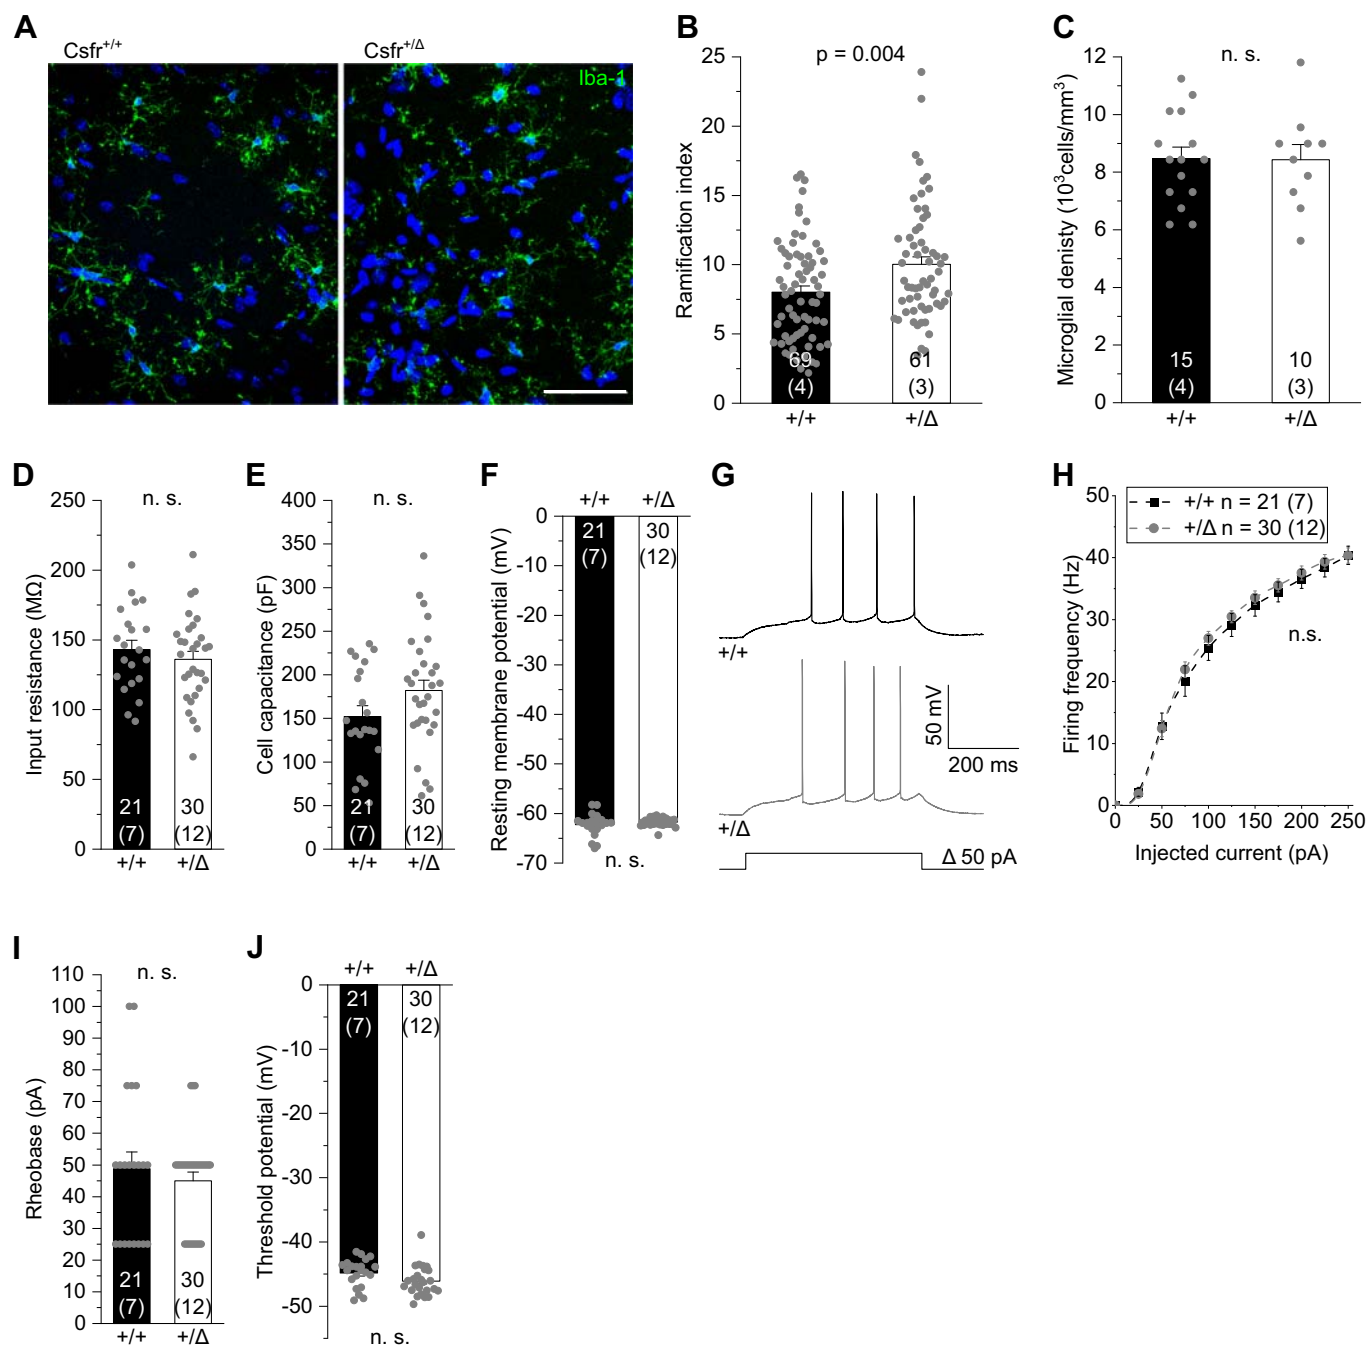

**Figure EV1. Normal excitability of CA1 pyramidal cells in heterozygous *Csfr*<sup>+/ $\Delta$</sup>  mice.**

(A) Specimen confocal images illustrating microglia by Iba1 immunoreactivity (green) in acute hippocampal slices of *Csfr*<sup>+/ $\Delta$</sup>  (+/ $\Delta$ ) and WT littermates (+/+). DAPI labeling of cellular nuclei in blue. Scale bar, 50  $\mu$ m. (B, C) Quantification of microglial ramification (B) and cell density (C) in the CA1 stratum radiatum. (D–F) Analysis of input resistance (D), cell capacitance (E) and resting membrane potential (F) of CA1 pyramidal cells. (G) Specimen traces showing action potential firing patterns of CA1 pyramidal cells in response to 500 ms depolarizing current injections. (H). Corresponding course of action potential firing frequencies of CA1 pyramidal cells on increasing depolarizations. (I, J) Values for rheobase (I) and action potential threshold voltage (J). Data information: Data indicate mean  $\pm$  SEM. Numbers on bars show tested cells or number of slices (C) and (number of animals). *P* values are from unpaired Student's *t* (B–F, J) or Mann–Whitney tests (I) and two-way ANOVA (H).

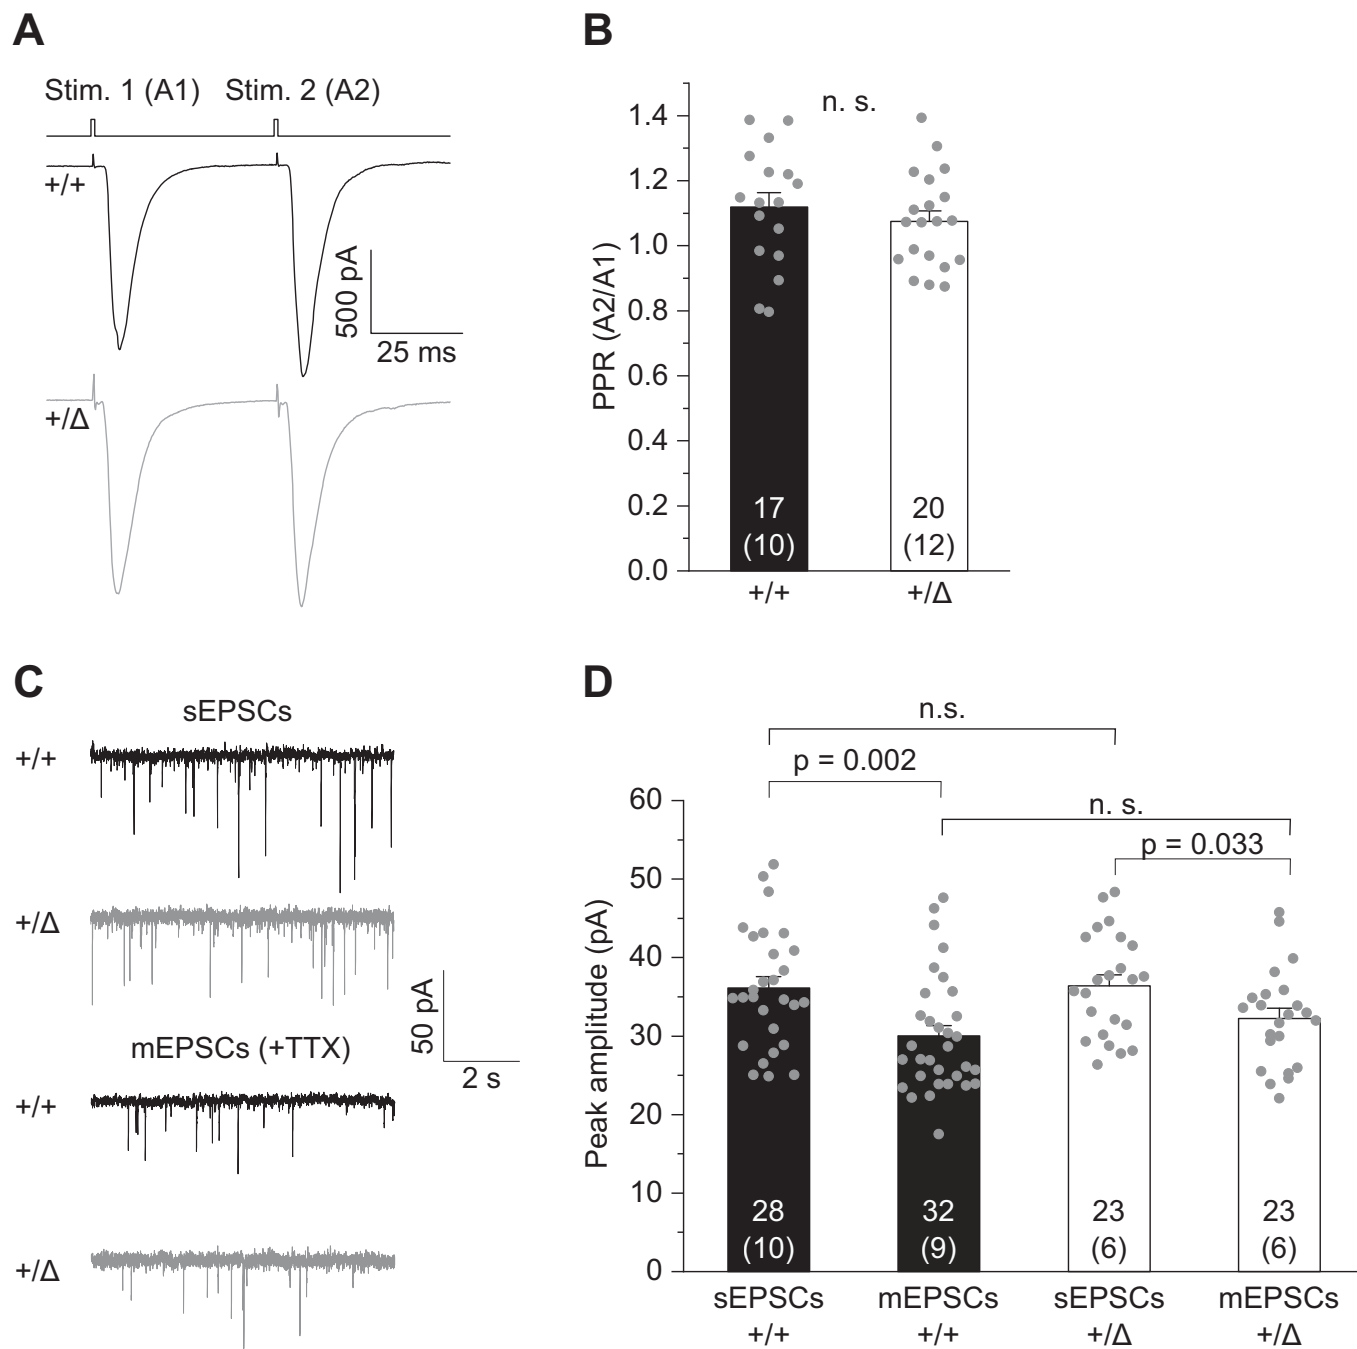

**Figure EV2. Normal glutamatergic transmission in heterozygous *Csf1r*<sup>+/ $\Delta$ FIRE</sup> mice.**

(A) Example traces (EPSCs) of CA1 pyramidal cells after paired-pulse stimulation at 50 ms inter-stimulus intervals. (B) Comparison of paired-pulse ratios (PPR) as the quotient of the second vs first EPSC amplitude (A2/A1) of CA1 pyramidal cells. (C) Specimen traces showing AMPAR-mediated spontaneous EPSCs (sEPSCs) and miniature EPSCs (mEPSCs) in the presence of 300 nM TTX of CA1 pyramidal cells. (D) Comparison of peak amplitudes of sEPSCs and mEPSCs. Data information: Data are represented as mean  $\pm$  SEM. Numbers on bars indicate tested cells and (number of animals). *P* values are from unpaired Student's *t* (B, D, for +/ $\Delta$  and sEPSC comparison) or Mann-Whitney tests (D, for +/+ and mEPSC comparison).

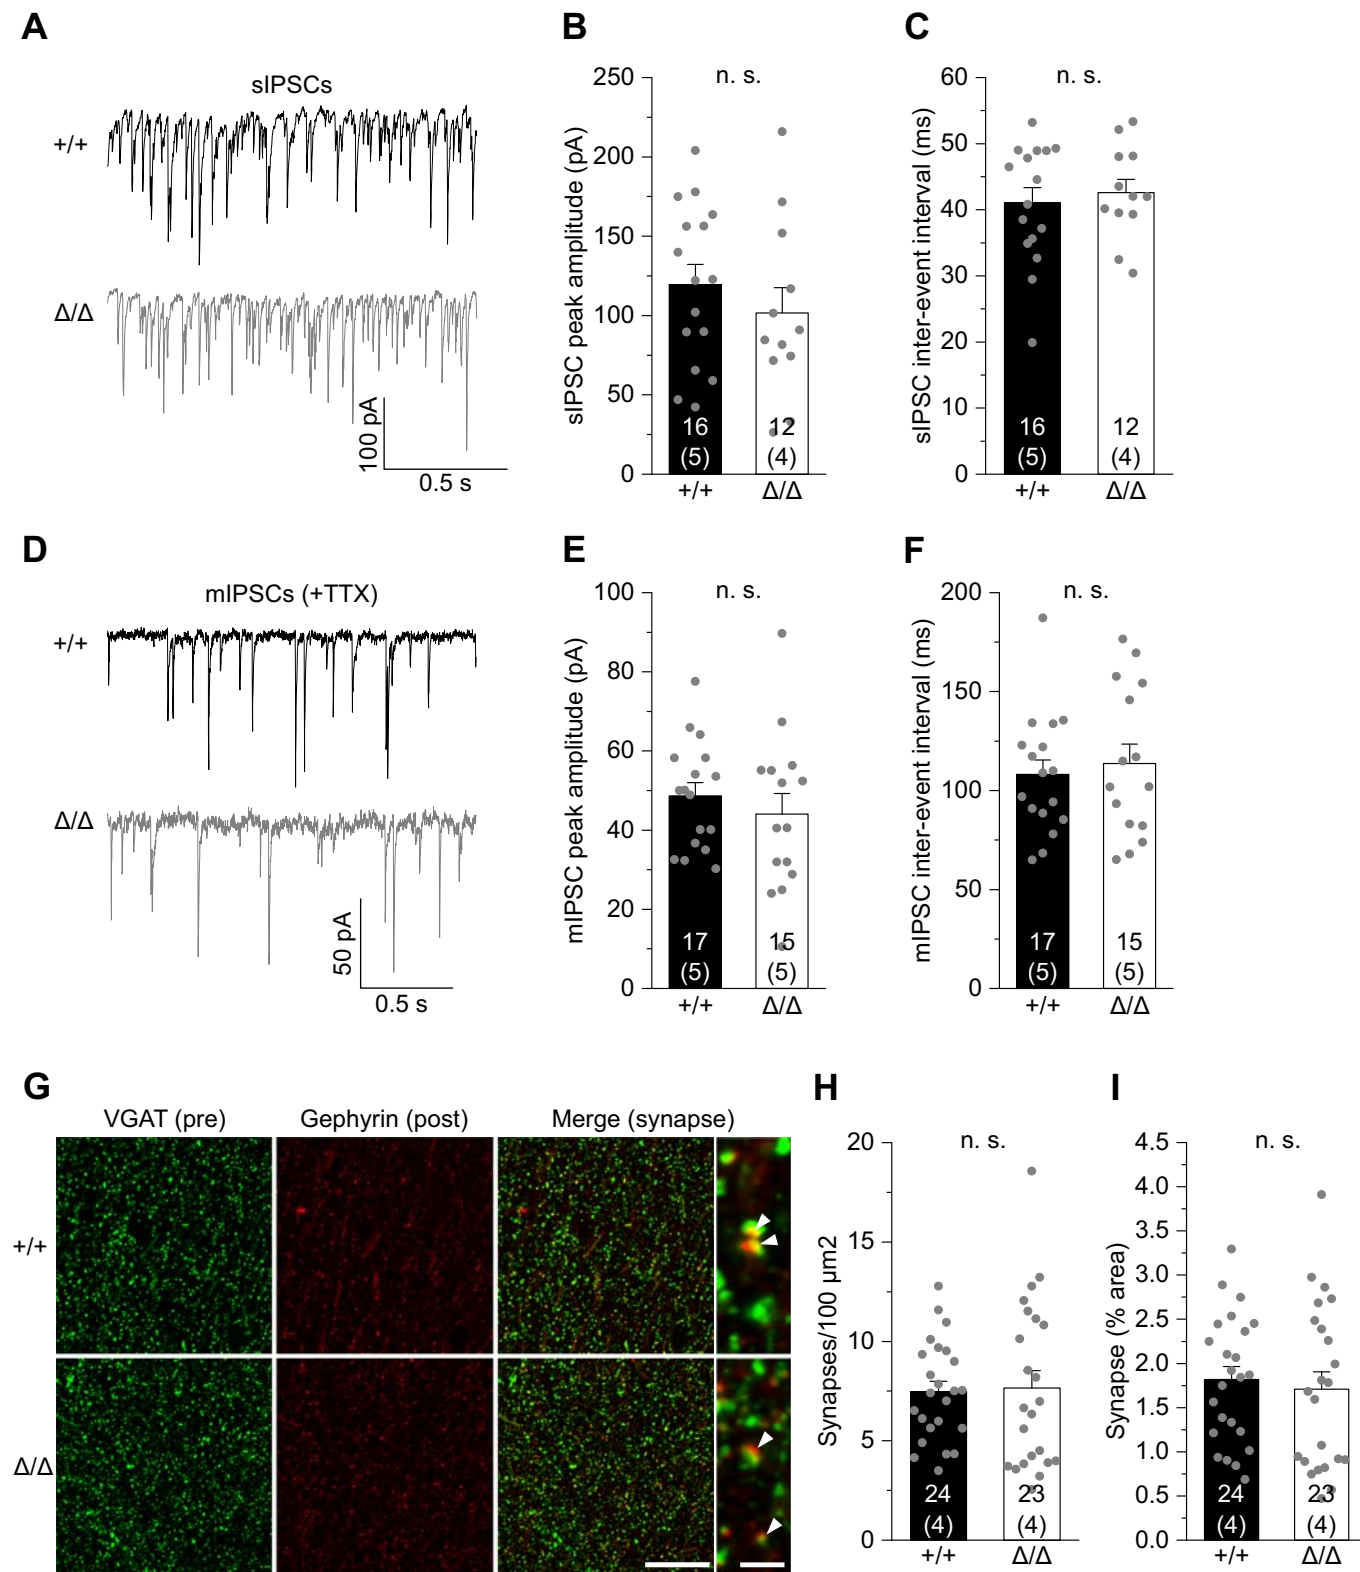

**◀ Figure EV3. Unaltered inhibitory synaptic transmission of CA1 pyramidal cells in *Csf1r*<sup>ΔFIRE/ΔFIRE</sup> mice.**

(A) Specimen traces showing GABA<sub>A</sub> receptor-evoked spontaneous inhibitory postsynaptic currents (sIPSCs) of CA1 pyramidal cells in +/+ and Δ/Δ mice. (B, C) Comparison of sIPSC peak amplitudes (B) and inter-event intervals (C). (D) Specimen traces showing miniature IPSCs (mIPSCs) of CA1 pyramidal cells. (E, F) Comparison of peak amplitudes (E) and inter-event intervals (F). (G) Confocal images showing VGAT-labeled presynaptic puncta (green) and Gephyrin-labeled postsynaptic puncta (red) in the CA1 *stratum radiatum* (left and middle) and colocalization of puncta (right, arrowheads). Scale bars, 20 μm and 2 μm (for expanded view). (H, I) Quantification of colocalized puncta (inhibitory synapses) per 100 μm<sup>2</sup> (H) and their area covered (I). Data information: Data indicate mean ± SEM. Numbers on bars show tested cells and (number of animals). *P* values are from unpaired Student's *t* (B, C, E, F, I) and Mann-Whitney (H) tests.

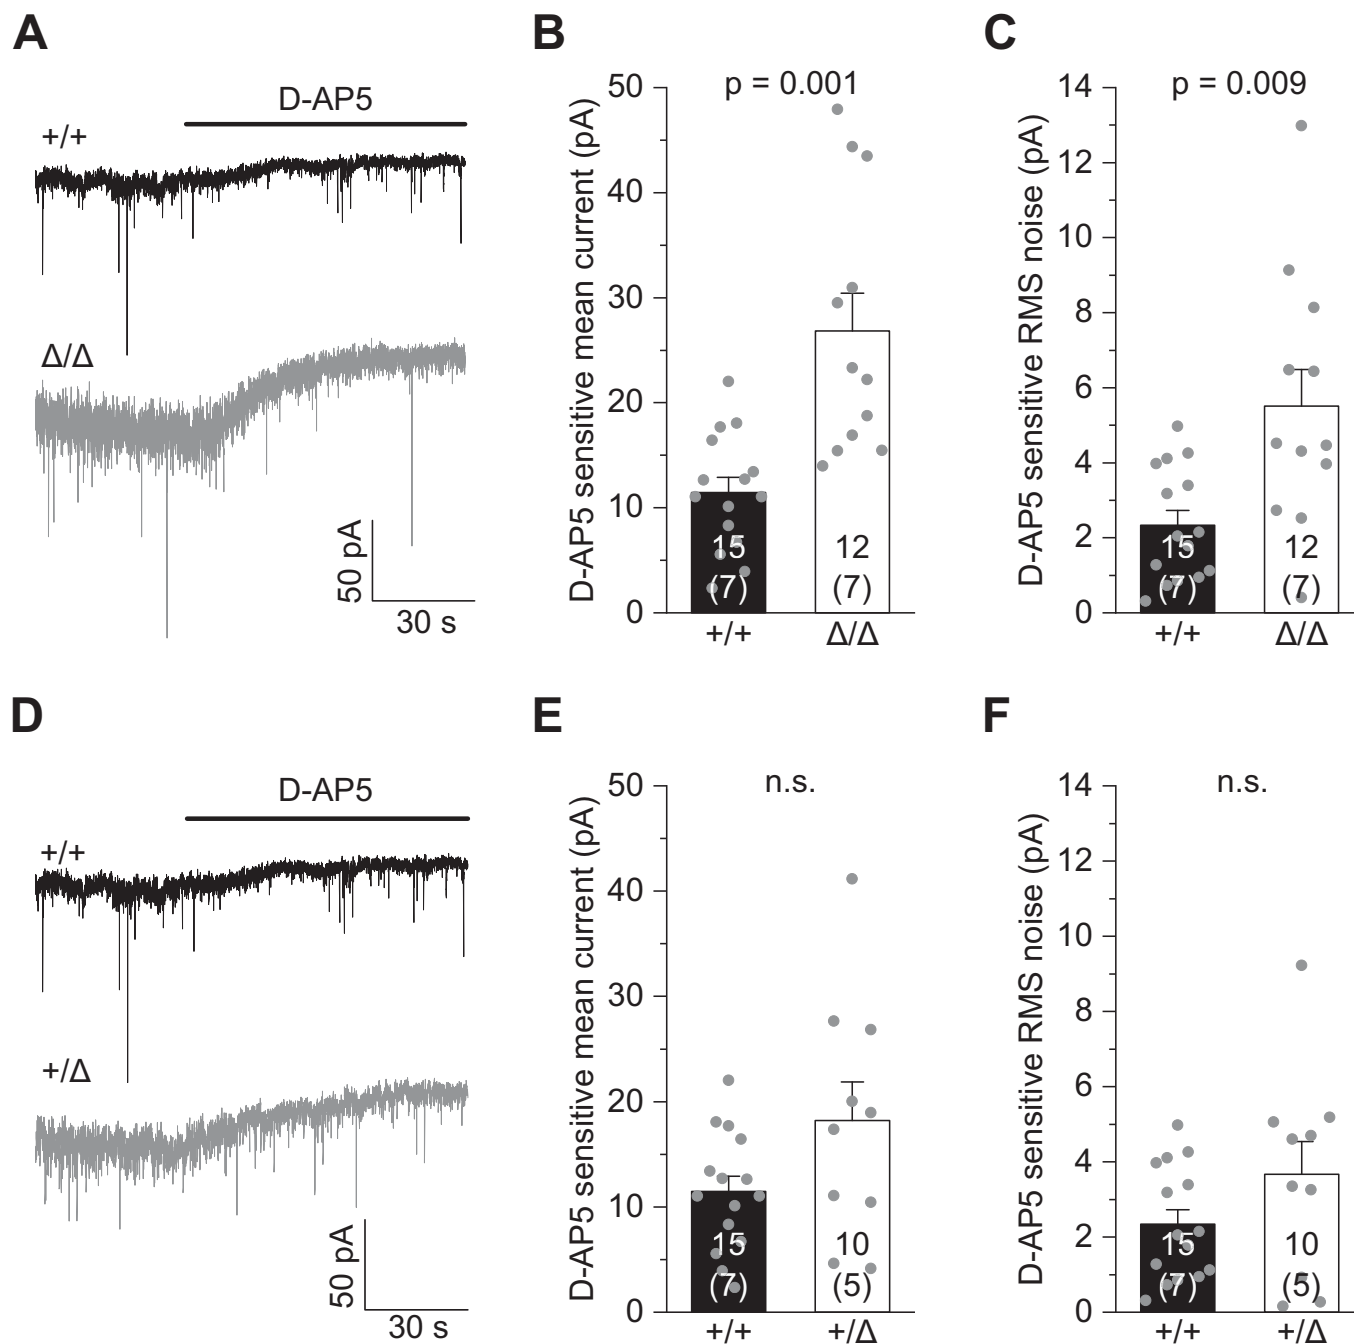

**Figure EV4. Increased tonic NMDA current in *Csflr*<sup>AFIRE/AFIRE</sup> mice.**

(A) Example traces showing changes in holding current after application of 50  $\mu$ M D-AP5 for  $\Delta/\Delta$  compared with  $+/+$  mice, reflecting blockade of all tonic NMDAR-mediated currents in CA1 pyramidal cells. Measurements were done in nominally  $Mg^{2+}$ -free extracellular solution in the presence of 300 nM TTX and 10  $\mu$ M glycine. (B, C) Comparison of the D-AP5-sensitive mean holding current (B) and root mean square (RMS) noise (C) for the different genotypes. Note the contribution of both synaptic and extrasynaptic NMDA receptors to these parameters. (D-F) Same as for (A-C), but comparison of wild-type ( $+/+$ ) and heterozygous phenotype ( $+/\Delta$ ). Data information: Data are represented as mean  $\pm$  SEM. Numbers on bars indicate tested cells and (number of animals). *P* values are from unpaired Student's *t* tests.

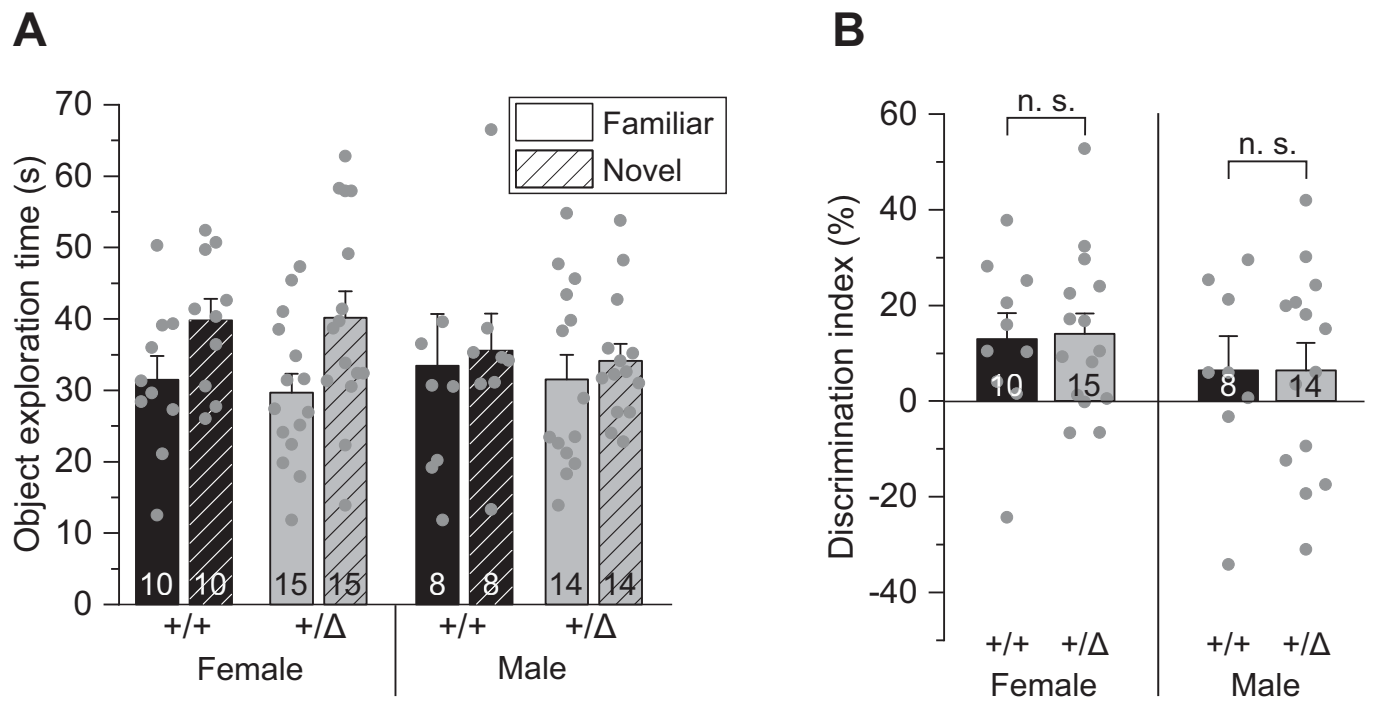

**Figure EV5. Unaltered object recognition memory in heterozygous *Csf1r*<sup>-ΔFIRE</sup> mice.**

(A) Comparison of exploration times of the familiar and novel object after habituation for male and female +/Δ and +/+ mice. (B) Comparison of the respective discrimination indices (see "Methods"). Data information: Data are represented as mean ± SEM. Numbers on bars indicate number of tested animals. *P* values are from two-way ANOVA (B).
